# Supplementary material
Source: PubMed Central journal article supplement (PMC7270644)
Supplement: mmc1.pdf [file mmc1.pdf]

# THE LANCET

## **Supplementary appendix**

This appendix formed part of the original submission. We post it as supplied by the authors.

Supplement to: Alwan NA, Bhopal R, Burges RA, et al. Evidence informing the UK's COVID-19 public health response must be transparent. *Lancet* 2020; published online March 17. [http://dx.doi.org/10.1016/S0140-6736\(20\)30667-X](http://dx.doi.org/10.1016/S0140-6736(20)30667-X).

## Signatories

Nisreen A Alwan, Associate Professor in Public Health, University of Southampton

Raj Bhopal, Emeritus Professor of Public Health, Usher Institute, University of Edinburgh

Rochelle A. Burgess, Deputy Director, UCL Centre for Global Non-Communicable Diseases; Lecturer in Global Health, UCL Institute for Global Health

Tim Colburn, Associate Professor of Global Health Epidemiology and Evaluation, UCL Institute for Global Health

Anthony Costello, Professor of Global Health and Sustainable Development, UCL

Luis E Cuevas, Professor of International Health and Epidemiology, Liverpool School of Tropical Medicine

George Davey Smith, Professor of Clinical Epidemiology, University of Bristol

Matthias Egger, Professor of Epidemiology and Public Health, University of Bristol

Sandra Eldridge, Professor of Biostatistics, Institute of Population Health Sciences, Queen Mary University of London

Paul Fine, Professor of Communicable Disease Epidemiology, LSHTM

Valentina Gallo, Honorary Associate Professor in Epidemiology, LSHTM

Mark S Gilthorpe, Professor of Statistical Epidemiology, University of Leeds

Trish Greenhalgh, Professor of Primary Care Health Sciences, University of Oxford

Christopher Griffiths, Professor of Primary Care at Barts and The London School of Medicine and Dentistry, Queen Mary University of London, Acting Director of the Institute of Population Health Sciences, Centre Lead for the Centre for Primary Care and Public Health

Paul R Hunter, Professor in Medicine, University of East Anglia

Shabbar Jaffar, Head of Department of International Public Health, Chair of Epidemiology, LSHTM

Ruth Jepson, Professor of Public Health in Social Science, University of Edinburgh

Andrew Lee, Reader in Global Public Health, University of Sheffield

Nicola Low, Professor of Epidemiology and Public Health, University of Bern

Adrian Martineau, Professor of Respiratory Infection and Immunity, Institute of Population Health Sciences, Queen Mary University of London

David McCoy, Professor of Global Public Health, Queen Mary University London

Borislava Mihaylova, Professor of Health Economics, Institute of Population Health Sciences, Queen Mary University of London

Miriam Orcutt, Senior Research Fellow, UCL Institute for Global Health

Bharat Pankhania, Senior Clinical Lecturer, University of Exeter

Hynek Pikhart, Professor of Epidemiology and Medical Statistics, UCL

Allyson Pollock, Professor of Public Health, Newcastle University

Gabriel Scally, Honorary Professor of Public Health, University of Bristol

Nicola Shelton, Professor of Population Health, UCL

Liam Smeeth, Professor of Clinical Epidemiology, Dean, Faculty of Epidemiology and Population Health, London School of Hygiene and Tropical Medicine

James Smith, Honorary Research Fellow, London School of Hygiene & Tropical Medicine

Devi Sridhar, Professor of Global Public Health, University of Edinburgh

Andrew Tatem, Professor of Spatial Demography and Epidemiology, University of Southampton

Stephanie Taylor, Professor in Public Health and Primary Care, Queen Mary University of London

Peter WG Tennant, University Academic Fellow in Health Data Science, University of Leeds

Yrene Themistocleous, Clinical Research Fellow, University of Oxford

Anne Wilson, Lecturer in Epidemiology, Liverpool School of Tropical Medicine
